# Supplementary material
Source: PubMed Central journal article supplement (PMC10065910)
Supplement: NIHMS1860088-supplement-2.pdf [file NIHMS1860088-supplement-2.pdf]

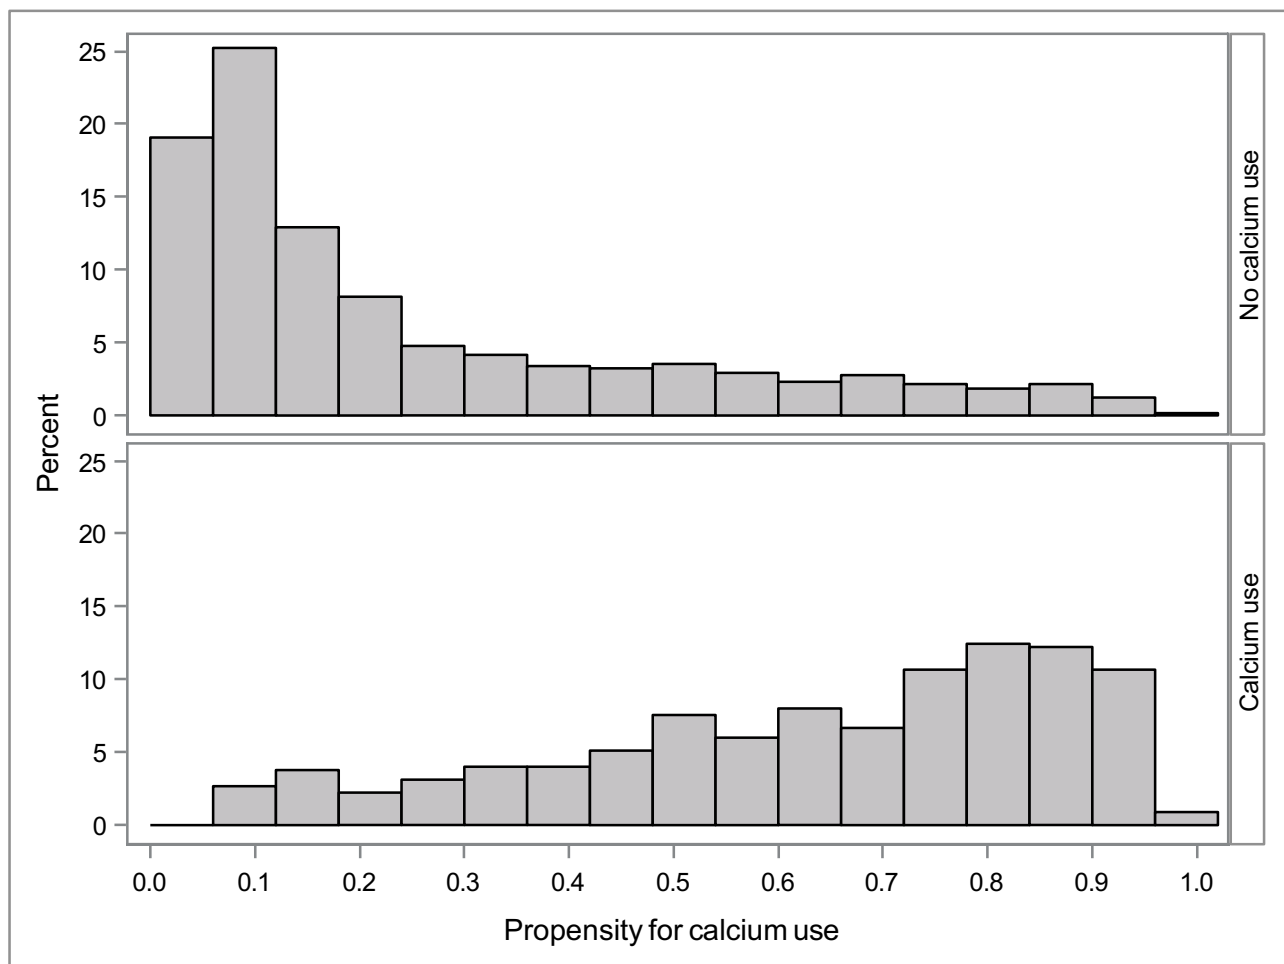

Supplemental Figure. Histograms of propensity for calcium use.

Propensity for calcium use is the probability of calcium use estimated from a multivariable logistic regression model. The top and bottom panels show histograms of these propensities for subjects who did not receive calcium versus those who did receive calcium, respectively.
